# Supplementary material for: Disaster Preparedness Evaluation Tool (DPET): Adaptation and psychometric evaluation for nurses in Germany
Source: Atypon-hosted journal article supplement (doi:10.1024/1012-5302/a000964), 2023-10-31
Supplement: 1012-5302_a000964_esm1.pdf [file 1012-5302_a000964_esm1.pdf]

## Electronic Supplementary Material 1

Disaster Preparedness Evaluation Tool (DPET): Adaptation and psychometric evaluation for nurses in Germany

### Contents

|                                                                                                         |    |
|---------------------------------------------------------------------------------------------------------|----|
| Table S1. <i>STROBE Checklist</i> .....                                                                 | 2  |
| Table S2. <i>Items on DPET rated as irrelevant for the nursing context in Germany</i> .....             | 5  |
| Table S3. <i>DPET-GER with 37 items</i> .....                                                           | 6  |
| Figure S1. <i>Response rate on the online survey</i> .....                                              | 9  |
| Table S4. <i>Location (federal state or residence) of participants in online survey (n = 317)</i> ..... | 10 |
| Table S5. <i>Item analysis</i> .....                                                                    | 11 |
| Table S6. <i>Factor loadings from exploratory factor analysis</i> .....                                 | 12 |
| Table S7. <i>Factor correlations</i> .....                                                              | 14 |

**Table S1. STROBE Checklist**

| <b>Item</b>                  | <b>Item No</b> | <b>Recommendation</b>                                                                                                                                                                | <b>Page Number</b> |
|------------------------------|----------------|--------------------------------------------------------------------------------------------------------------------------------------------------------------------------------------|--------------------|
| <b>Title and abstract</b>    | 1              | (a) Indicate the study's design with a commonly used term in the title or the abstract                                                                                               | 1                  |
|                              |                | (b) Provide in the abstract an informative and balanced summary of what was done and what was found                                                                                  | 1                  |
| <b>Introduction</b>          |                |                                                                                                                                                                                      |                    |
| Background/rationale         | 2              | Explain the scientific background and rationale for the investigation being reported                                                                                                 | 2                  |
| Objectives                   | 3              | State specific objectives, including any prespecified hypotheses                                                                                                                     | 2-3                |
| <b>Methods</b>               |                |                                                                                                                                                                                      |                    |
| Study design                 | 4              | Present key elements of study design early in the paper                                                                                                                              | 1, 4               |
| Setting                      | 5              | Describe the setting, locations, and relevant dates, including periods of recruitment, exposure, follow-up, and data collection                                                      | 4                  |
| Participants                 | 6              | (a) Give the eligibility criteria, and the sources and methods of selection of participants                                                                                          | 4                  |
| Variables                    | 7              | Clearly define all outcomes, exposures, predictors, potential confounders, and effect modifiers. Give diagnostic criteria, if applicable                                             | 4                  |
| Data sources/<br>measurement | 8*             | For each variable of interest, give sources of data and details of methods of assessment (measurement). Describe comparability of assessment methods if there is more than one group | 4                  |
| Bias                         | 9              | Describe any efforts to address potential sources of bias                                                                                                                            | 4                  |
| Study size                   | 10             | Explain how the study size was arrived at                                                                                                                                            | 4                  |
| Quantitative variables       | 11             | Explain how quantitative variables were handled in the analyses. If applicable, describe which groupings were chosen and why                                                         | 4                  |
| Statistical methods          | 12             | (a) Describe all statistical methods, including those used to control for confounding                                                                                                | 4-5                |

|                   |     |                                                                                                                                                                                                              |                                                                                                              |
|-------------------|-----|--------------------------------------------------------------------------------------------------------------------------------------------------------------------------------------------------------------|--------------------------------------------------------------------------------------------------------------|
|                   |     | (b) Describe any methods used to examine subgroups and interactions                                                                                                                                          | No subgroup analyses conducted                                                                               |
|                   |     | (c) Explain how missing data were addressed                                                                                                                                                                  | Complete case analysis                                                                                       |
|                   |     | (d) If applicable, describe analytical methods taking account of sampling strategy                                                                                                                           | 4                                                                                                            |
|                   |     | (e) Describe any sensitivity analyses                                                                                                                                                                        | Not conducted                                                                                                |
| <b>Results</b>    |     |                                                                                                                                                                                                              |                                                                                                              |
| Participants      | 13* | (a) Report numbers of individuals at each stage of study—eg numbers potentially eligible, examined for eligibility, confirmed eligible, included in the study, completing follow-up, and analysed            | 5                                                                                                            |
|                   |     | (b) Give reasons for non-participation at each stage                                                                                                                                                         | Complete case analysis                                                                                       |
|                   |     | (c) Consider use of a flow diagram                                                                                                                                                                           | Figure S1                                                                                                    |
| Descriptive data  | 14* | (a) Give characteristics of study participants (eg demographic, clinical, social) and information on exposures and potential confounders                                                                     | Page 5 and Table 2                                                                                           |
|                   |     | (b) Indicate number of participants with missing data for each variable of interest                                                                                                                          | Complete case analysis                                                                                       |
| Outcome data      | 15* | Report numbers of outcome events or summary measures                                                                                                                                                         | Not carried out because data was only collected for the questionnaire and not evaluated in terms of content. |
| Main results      | 16  | (a) Give unadjusted estimates and, if applicable, confounder-adjusted estimates and their precision (eg, 95% confidence interval). Make clear which confounders were adjusted for and why they were included | 5-6                                                                                                          |
|                   |     | (b) Report category boundaries when continuous variables were categorized                                                                                                                                    | Not conducted                                                                                                |
|                   |     | (c) If relevant, consider translating estimates of relative risk into absolute risk for a meaningful time period                                                                                             | Not relevant                                                                                                 |
| Other analyses    | 17  | Report other analyses done—eg analyses of subgroups and interactions, and sensitivity analyses                                                                                                               | Not conducted                                                                                                |
| <b>Discussion</b> |     |                                                                                                                                                                                                              |                                                                                                              |
| Key results       | 18  | Summarise key results with reference to study objectives                                                                                                                                                     | 6                                                                                                            |

|                          |    |                                                                                                                                                                            |            |
|--------------------------|----|----------------------------------------------------------------------------------------------------------------------------------------------------------------------------|------------|
| Limitations              | 19 | Discuss limitations of the study, taking into account sources of potential bias or imprecision. Discuss both direction and magnitude of any potential bias                 | 7          |
| Interpretation           | 20 | Give a cautious overall interpretation of results considering objectives, limitations, multiplicity of analyses, results from similar studies, and other relevant evidence | 6-7        |
| Generalisability         | 21 | Discuss the generalisability (external validity) of the study results                                                                                                      | 6-7        |
| <b>Other information</b> |    |                                                                                                                                                                            |            |
| Funding                  | 22 | Give the source of funding and the role of the funders for the present study and, if applicable, for the original study on which the present article is based              | No funding |

*Note.* Source: von Elm E, Altman DG, Egger M, Pocock SJ, Gøtzsche PC, Vandenbroucke JP. Strengthening the Reporting of Observational Studies in Epidemiology (STROBE) Statement: Guidelines for reporting observational studies. *BMJ*. 2007; 335(7624): 806. doi:10.1136/bmj.39335.541782.AD.

**Table S2.** *Items on the DPET rated as irrelevant for the nursing context in Germany*

| <b>Item on DPET</b> | <b>German translation</b>                                                                                                                                                 |
|---------------------|---------------------------------------------------------------------------------------------------------------------------------------------------------------------------|
| 2                   | Example translation: Ich habe an der Ausarbeitung von Notfallplänen und an der Notfallplanung für Katastrophenfälle in meiner Gemeinde mitgewirkt oder wirke aktuell mit. |
| 8                   |                                                                                                                                                                           |
| 9                   |                                                                                                                                                                           |
| 12                  |                                                                                                                                                                           |
| 15                  |                                                                                                                                                                           |
| 16                  |                                                                                                                                                                           |
| 33                  |                                                                                                                                                                           |
| 42                  |                                                                                                                                                                           |
| 46                  |                                                                                                                                                                           |
| 47                  |                                                                                                                                                                           |

*Note.* Due to the copyright of the original DPET, the German translation of the excluded items is available on request from the first author.

**Table S3. DPET-GER with 37 items**

**Original tool:** Disaster Preparedness Evaluation Tool (DPET)

**Source:** Tichy, M., Bond, A. E., Beckstrand, R. L., & Heise, B. (2008). NPs' perceptions of disaster preparedness education: Quantitative survey research. *American Journal for Nurse Practitioners*, 13(1), 10-22.

**Translation:** Due to the copyright of the original DPET, the German translation of DPET is available on request from the first author.

**Bereitschaft von Pflegefachkräften für Katastrophenfälle (DPET-GER)**

*German translation of Disaster Preparedness Evaluation Tool (DPET)*

**Definition einer Katastrophe:**

Die folgenden Fragen beziehen sich darauf, wie Du Deine berufliche und persönliche Vorbereitung auf Katastrophen einschätzt. Bewerte die Fragen von „Trifft überhaupt nicht zu“ bis „Trifft vollkommen zu“.

| Item-DPET | Item DPET-GER | Item                                                                                                                       | 1 =<br>Trifft<br>überha<br>upt<br>nicht<br>zu | 2 =<br>Trifft<br>nicht<br>zu | 3 =<br>Trifft<br>eher<br>nicht<br>zu | 4 =<br>Trifft<br>eher zu | 5 =<br>Trifft<br>zu   | 6 =<br>Trifft<br>vollko<br>mmen<br>zu |
|-----------|---------------|----------------------------------------------------------------------------------------------------------------------------|-----------------------------------------------|------------------------------|--------------------------------------|--------------------------|-----------------------|---------------------------------------|
| 1         | 1             | Example item: Ich nehme regelmäßig an Katastrophenschutzübungen an meinem Arbeitsplatz teil (zum Beispiel im Krankenhaus). | <input type="radio"/>                         | <input type="radio"/>        | <input type="radio"/>                | <input type="radio"/>    | <input type="radio"/> | <input type="radio"/>                 |
| 3         | 2             |                                                                                                                            | <input type="radio"/>                         | <input type="radio"/>        | <input type="radio"/>                | <input type="radio"/>    | <input type="radio"/> | <input type="radio"/>                 |
| 4         | 3             |                                                                                                                            | <input type="radio"/>                         | <input type="radio"/>        | <input type="radio"/>                | <input type="radio"/>    | <input type="radio"/> | <input type="radio"/>                 |
| 5         | 4             |                                                                                                                            | <input type="radio"/>                         | <input type="radio"/>        | <input type="radio"/>                | <input type="radio"/>    | <input type="radio"/> | <input type="radio"/>                 |
| 6         | 5             |                                                                                                                            | <input type="radio"/>                         | <input type="radio"/>        | <input type="radio"/>                | <input type="radio"/>    | <input type="radio"/> | <input type="radio"/>                 |
| 7         | 6             |                                                                                                                            | <input type="radio"/>                         | <input type="radio"/>        | <input type="radio"/>                | <input type="radio"/>    | <input type="radio"/> | <input type="radio"/>                 |
| 10        | 7             |                                                                                                                            | <input type="radio"/>                         | <input type="radio"/>        | <input type="radio"/>                | <input type="radio"/>    | <input type="radio"/> | <input type="radio"/>                 |
| 11        | 8             |                                                                                                                            | <input type="radio"/>                         | <input type="radio"/>        | <input type="radio"/>                | <input type="radio"/>    | <input type="radio"/> | <input type="radio"/>                 |
| 13        | 9             |                                                                                                                            | <input type="radio"/>                         | <input type="radio"/>        | <input type="radio"/>                | <input type="radio"/>    | <input type="radio"/> | <input type="radio"/>                 |
| 14        | 10            |                                                                                                                            | <input type="radio"/>                         | <input type="radio"/>        | <input type="radio"/>                | <input type="radio"/>    | <input type="radio"/> | <input type="radio"/>                 |
| 17        | 11            |                                                                                                                            | <input type="radio"/>                         | <input type="radio"/>        | <input type="radio"/>                | <input type="radio"/>    | <input type="radio"/> | <input type="radio"/>                 |
| 18        | 12            |                                                                                                                            | <input type="radio"/>                         | <input type="radio"/>        | <input type="radio"/>                | <input type="radio"/>    | <input type="radio"/> | <input type="radio"/>                 |
| 19        | 13            |                                                                                                                            | <input type="radio"/>                         | <input type="radio"/>        | <input type="radio"/>                | <input type="radio"/>    | <input type="radio"/> | <input type="radio"/>                 |
| 20        | 14            |                                                                                                                            | <input type="radio"/>                         | <input type="radio"/>        | <input type="radio"/>                | <input type="radio"/>    | <input type="radio"/> | <input type="radio"/>                 |
| 21        | 15            |                                                                                                                            | <input type="radio"/>                         | <input type="radio"/>        | <input type="radio"/>                | <input type="radio"/>    | <input type="radio"/> | <input type="radio"/>                 |
| 22        | 16            |                                                                                                                            | <input type="radio"/>                         | <input type="radio"/>        | <input type="radio"/>                | <input type="radio"/>    | <input type="radio"/> | <input type="radio"/>                 |
| 23        | 17            |                                                                                                                            | <input type="radio"/>                         | <input type="radio"/>        | <input type="radio"/>                | <input type="radio"/>    | <input type="radio"/> | <input type="radio"/>                 |
| 24        | 18            |                                                                                                                            | <input type="radio"/>                         | <input type="radio"/>        | <input type="radio"/>                | <input type="radio"/>    | <input type="radio"/> | <input type="radio"/>                 |
| 25        | 19            |                                                                                                                            | <input type="radio"/>                         | <input type="radio"/>        | <input type="radio"/>                | <input type="radio"/>    | <input type="radio"/> | <input type="radio"/>                 |
| 26        | 20            |                                                                                                                            | <input type="radio"/>                         | <input type="radio"/>        | <input type="radio"/>                | <input type="radio"/>    | <input type="radio"/> | <input type="radio"/>                 |
| 27        | 21            |                                                                                                                            | <input type="radio"/>                         | <input type="radio"/>        | <input type="radio"/>                | <input type="radio"/>    | <input type="radio"/> | <input type="radio"/>                 |
| 28        | 22            |                                                                                                                            | <input type="radio"/>                         | <input type="radio"/>        | <input type="radio"/>                | <input type="radio"/>    | <input type="radio"/> | <input type="radio"/>                 |
| 29        | 23            |                                                                                                                            | <input type="radio"/>                         | <input type="radio"/>        | <input type="radio"/>                | <input type="radio"/>    | <input type="radio"/> | <input type="radio"/>                 |
| 30        | 24            |                                                                                                                            | <input type="radio"/>                         | <input type="radio"/>        | <input type="radio"/>                | <input type="radio"/>    | <input type="radio"/> | <input type="radio"/>                 |
| 31        | 25            |                                                                                                                            | <input type="radio"/>                         | <input type="radio"/>        | <input type="radio"/>                | <input type="radio"/>    | <input type="radio"/> | <input type="radio"/>                 |

|    |    |  |                       |                       |                       |                       |                       |                       |
|----|----|--|-----------------------|-----------------------|-----------------------|-----------------------|-----------------------|-----------------------|
| 32 | 26 |  | <input type="radio"/> |
| 34 | 27 |  | <input type="radio"/> |
| 35 | 28 |  | <input type="radio"/> |
| 36 | 29 |  | <input type="radio"/> |
| 37 | 30 |  | <input type="radio"/> |
| 38 | 31 |  | <input type="radio"/> |
| 39 | 32 |  | <input type="radio"/> |
| 40 | 33 |  | <input type="radio"/> |
| 41 | 34 |  | <input type="radio"/> |
| 43 | 35 |  | <input type="radio"/> |
| 44 | 36 |  | <input type="radio"/> |
| 45 | 37 |  | <input type="radio"/> |

### Soziodemografische Daten

Bitte erzähle ein wenig über Dich, indem Du die entsprechenden Felder ausfüllst:

38. Wie viele Jahre Erfahrung als Pflegefachkraft hast du?

\_\_\_\_\_ Jahre

39. Welchem Geschlecht fühlst Du dich zugehörig?

- Männlich
- Weiblich
- Divers

40. Wie alt bist Du?

\_\_\_\_\_ Jahre

41. Welche Berufsbezeichnung darfst Du laut deiner Berufsurkunde führen?

- Krankenschwester/-pfleger
- Kinderkrankenschwester/-pfleger
- Gesundheits- und Kinderkranknenpfleger:in
- Gesundheits- und Krankenpfleger:in
- Altenpfleger:in
- Pflegefachmann/-frau

42. Hast Du eine Weiterbildung in der Pflege abgeschlossen? (wenn nein, überspringe die folgende Frage)

- Ja
- Nein

43. Welche Art der Weiterbildung hast Du abgeschlossen?

- Fachweiterbildung nach Landesrecht (z.B. Fachkrankenpfleger:in für Notfallpflege)
- Bachelor in einer pflegerischen Disziplin
- Master in einer pflegerischen Disziplin
- Promotion zu einem pflegerischen Thema
- Sonstiges: \_\_\_\_\_

44. In welcher Art der Einrichtung bist Du als Pflegefachkraft tätig?

- Krankenhaus
- Vorsorge- oder Rehabilitationseinrichtung
- Ambulante Pflegeeinrichtung (Pflegedienst)
- Stationäre Pflegeeinrichtung (Pflegeheim: stationär oder teilstationär)

45. Welche Erwerbssituation passt für Dich?

- Vollzeit
- Teilzeit

**Vielen Dank für Deine Teilnahme an dieser Studie!**



**Figure S1.** *Response rate on the online survey*

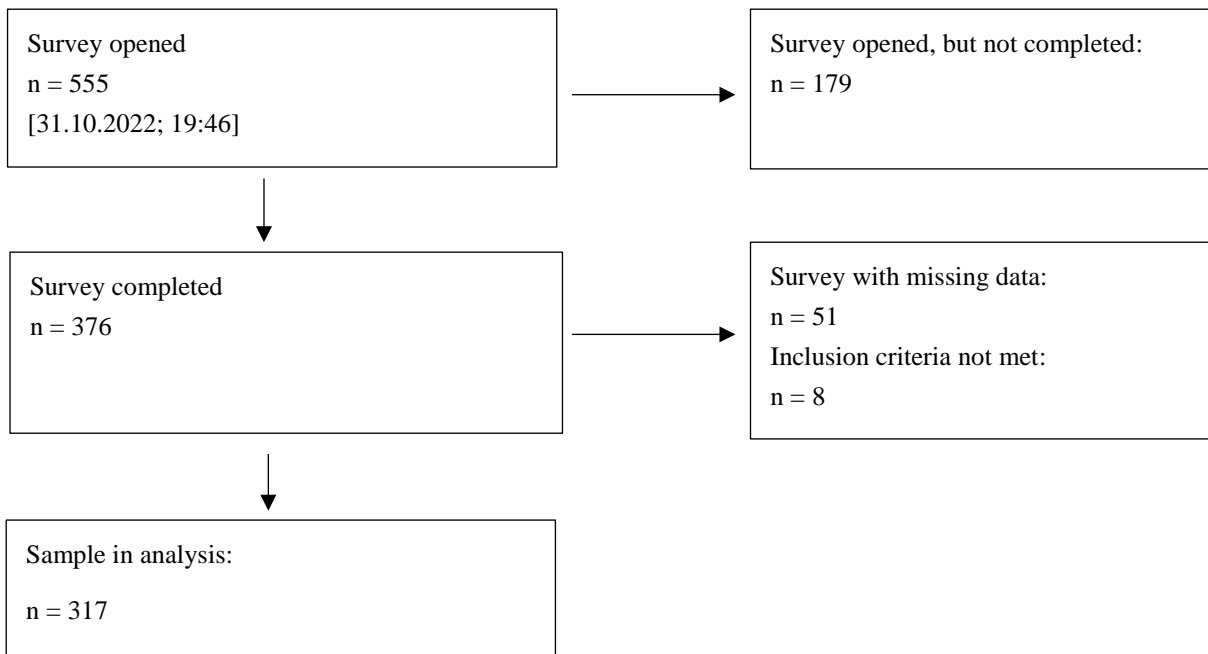

**Table S4.** *Location (federal state or residence) of participants in online survey (n = 317)*

| Characteristic                | n   | %     |
|-------------------------------|-----|-------|
| Federal state                 |     |       |
| Baden-Württemberg             | 14  | 4.42  |
| Bavaria                       | 44  | 13.88 |
| Berlin                        | 27  | 8.52  |
| Brandenburg                   | 1   | 0.32  |
| Bremen                        | 3   | 0.95  |
| Hamburg                       | 7   | 2.21  |
| Hessen                        | 17  | 5.36  |
| Lower Saxony                  | 39  | 12.30 |
| Mecklenburg-Western Pomerania | 8   | 2.52  |
| North Rhine-Westphalia        | 131 | 41.32 |
| Rhineland-Palatinate          | 6   | 1.89  |
| Saarland                      | 2   | 0.63  |
| Saxony                        | 5   | 1.58  |
| Saxony-Anhalt                 | 1   | 0.32  |
| Schleswig-Holstein            | 6   | 1.89  |
| Thuringia                     | 6   | 1.89  |

**Table S5.** *Item analysis*

| DPET item | DPET-GER item | n   | <i>M</i> | <i>SD</i> | Communality | Discrimination (item-total correlation) | Cronbach's alpha | Cronbach's alpha if item removed |
|-----------|---------------|-----|----------|-----------|-------------|-----------------------------------------|------------------|----------------------------------|
| 1         | 1             | 317 | 2.16     | 1.48      | 0.61        | 0.58                                    | 0.941            | 0.939                            |
| 3         | 2             | 317 | 2.88     | 1.62      | 0.66        | 0.61                                    | 0.941            | 0.938                            |
| 4         | 3             | 317 | 2.35     | 1.50      | 0.63        | 0.58                                    | 0.941            | 0.939                            |
| 5         | 4             | 317 | 2.29     | 1.48      | 0.52        | 0.56                                    | 0.941            | 0.939                            |
| 6         | 5             | 317 | 2.40     | 1.54      | 0.48        | 0.46                                    | 0.941            | 0.940                            |
| 7         | 6             | 317 | 4.71     | 1.08      | 0.39        | 0.23                                    | 0.941            | 0.941                            |
| 10        | 7             | 317 | 2.58     | 1.25      | 0.65        | 0.71                                    | 0.941            | 0.938                            |
| 11        | 8             | 317 | 4.03     | 1.29      | 0.42        | -0.03                                   | 0.941            | 0.944                            |
| 13        | 9             | 317 | 3.48     | 1.63      | 0.57        | 0.60                                    | 0.941            | 0.939                            |
| 14        | 10            | 317 | 3.39     | 1.27      | 0.20        | 0.23                                    | 0.941            | 0.942                            |
| 17        | 11            | 317 | 3.65     | 1.40      | 0.36        | 0.43                                    | 0.941            | 0.940                            |
| 18        | 12            | 317 | 4.09     | 1.28      | 0.44        | 0.46                                    | 0.941            | 0.940                            |
| 19        | 13            | 317 | 3.43     | 1.66      | 0.73        | 0.54                                    | 0.941            | 0.939                            |
| 20        | 14            | 317 | 2.63     | 1.44      | 0.75        | 0.65                                    | 0.941            | 0.938                            |
| 21        | 15            | 317 | 3.33     | 1.53      | 0.71        | 0.60                                    | 0.941            | 0.939                            |
| 22        | 16            | 317 | 2.67     | 1.36      | 0.57        | 0.68                                    | 0.941            | 0.938                            |
| 23        | 17            | 317 | 3.74     | 1.59      | 0.65        | 0.60                                    | 0.941            | 0.938                            |
| 24        | 18            | 317 | 2.13     | 1.29      | 0.69        | 0.52                                    | 0.941            | 0.939                            |
| 25        | 19            | 317 | 2.14     | 1.33      | 0.61        | 0.49                                    | 0.941            | 0.940                            |
| 26        | 20            | 317 | 3.91     | 1.19      | 0.50        | 0.55                                    | 0.941            | 0.939                            |
| 27        | 21            | 317 | 4.06     | 1.16      | 0.59        | 0.52                                    | 0.941            | 0.939                            |
| 28        | 22            | 317 | 3.47     | 1.35      | 0.66        | 0.56                                    | 0.941            | 0.939                            |
| 29        | 23            | 317 | 3.57     | 1.28      | 0.63        | 0.64                                    | 0.941            | 0.938                            |
| 30        | 24            | 317 | 2.51     | 1.25      | 0.59        | 0.69                                    | 0.941            | 0.938                            |
| 31        | 25            | 317 | 2.82     | 1.26      | 0.61        | 0.70                                    | 0.941            | 0.938                            |
| 32        | 26            | 317 | 3.10     | 1.31      | 0.67        | 0.68                                    | 0.941            | 0.938                            |
| 34        | 27            | 317 | 3.40     | 1.29      | 0.44        | 0.53                                    | 0.941            | 0.939                            |
| 35        | 28            | 317 | 2.37     | 1.23      | 0.64        | 0.69                                    | 0.941            | 0.938                            |
| 36        | 29            | 317 | 3.12     | 1.43      | 0.63        | 0.62                                    | 0.941            | 0.938                            |
| 37        | 30            | 317 | 3.86     | 1.38      | 0.14        | -0.02                                   | 0.941            | 0.944                            |
| 38        | 31            | 317 | 3.76     | 1.21      | 0.48        | 0.54                                    | 0.941            | 0.939                            |
| 39        | 32            | 317 | 2.32     | 1.30      | 0.64        | 0.70                                    | 0.941            | 0.938                            |
| 40        | 33            | 317 | 3.44     | 1.29      | 0.57        | 0.62                                    | 0.941            | 0.938                            |
| 41        | 34            | 317 | 3.73     | 1.39      | 0.63        | 0.55                                    | 0.941            | 0.939                            |
| 43        | 35            | 317 | 2.15     | 0.97      | 0.56        | 0.50                                    | 0.941            | 0.939                            |
| 44        | 36            | 317 | 3.35     | 1.38      | 0.58        | 0.65                                    | 0.941            | 0.938                            |
| 45        | 37            | 317 | 2.45     | 1.42      | 0.36        | 0.53                                    | 0.941            | 0.939                            |

*Note.* Item rating scale: 1 = strongly disagree, 2 = disagree, 3 = somewhat disagree, 4 = somewhat agree, 5 = agree, 6 = strongly agree.

**Table S6.** *Factor loadings from exploratory factor analysis*

| DPET-<br>GER<br>item | Factor loadings following Oblimin rotation |              |             |             |             | Cronbach's<br>alpha for<br>all items<br>per factor | Cronbach's<br>alpha if<br>item<br>removed<br>per factor |
|----------------------|--------------------------------------------|--------------|-------------|-------------|-------------|----------------------------------------------------|---------------------------------------------------------|
|                      | 1                                          | 2            | 3           | 4           | 5           |                                                    |                                                         |
| 3                    | <b>0.76</b>                                | -0.03        | 0.05        | 0.00        | 0.08        | 0.87<br>(factor 1)                                 | 0.78                                                    |
| 2                    | <b>0.76</b>                                | -0.05        | 0.01        | 0.06        | 0.15        |                                                    | 0.77                                                    |
| 1                    | <b>0.74</b>                                | -0.05        | 0.00        | 0.11        | 0.06        |                                                    | 0.78                                                    |
| 5                    | <b>0.68</b>                                | -0.02        | 0.10        | 0.01        | -0.14       |                                                    | 0.79                                                    |
| 9                    | <b>0.61</b>                                | -0.06        | 0.17        | 0.22        | -0.08       |                                                    | 0.79                                                    |
| 7                    | <b>0.59</b>                                | 0.16         | 0.04        | 0.13        | 0.13        |                                                    | 0.83                                                    |
| 16                   | <b>0.53</b>                                | 0.14         | 0.09        | 0.10        | 0.17        |                                                    | 0.77                                                    |
| 10                   | <b>0.40</b>                                | 0.03         | 0.19        | -0.16       | -0.18       |                                                    | 0.85                                                    |
| 29                   | -0.08                                      | <b>0.73</b>  | 0.13        | 0.07        | 0.12        |                                                    | 0.87                                                    |
| 26                   | 0.01                                       | <b>0.62</b>  | 0.23        | 0.19        | -0.07       |                                                    | 0.86                                                    |
| 33                   | 0.11                                       | <b>0.59</b>  | 0.17        | -0.05       | 0.12        | 0.87                                               |                                                         |
| 31                   | -0.13                                      | <b>0.53</b>  | 0.18        | 0.13        | 0.15        | 0.87                                               |                                                         |
| 28                   | 0.09                                       | <b>0.51</b>  | -0.01       | 0.37        | 0.11        | 0.86                                               |                                                         |
| 27                   | 0.01                                       | <b>0.50</b>  | -0.03       | 0.31        | 0.01        | 0.90                                               |                                                         |
| 24                   | 0.11                                       | <b>0.45</b>  | 0.10        | 0.26        | 0.16        | (factor 2)                                         | 0.87                                                    |
| 25                   | 0.07                                       | <b>0.45</b>  | 0.15        | 0.33        | 0.07        | 0.86                                               |                                                         |
| 32                   | 0.40                                       | <b>0.42</b>  | 0.09        | -0.08       | 0.25        | 0.87                                               |                                                         |
| 30                   | 0.08                                       | <b>-0.32</b> | 0.05        | -0.05       | 0.29        | 0.91                                               |                                                         |
| 37                   | 0.21                                       | <b>0.30</b>  | 0.27        | -0.02       | 0.01        | 0.88                                               |                                                         |
| 17                   | 0.14                                       | <b>0.30</b>  | 0.12        | 0.28        | 0.09        | 0.87                                               |                                                         |
| 22                   | 0.09                                       | 0.00         | <b>0.78</b> | -0.04       | 0.04        | 0.83                                               |                                                         |
| 35                   | 0.05                                       | 0.05         | <b>0.73</b> | -0.05       | -0.02       | 0.84                                               |                                                         |
| 21                   | -0.07                                      | -0.07        | <b>0.72</b> | 0.15        | 0.11        | 0.85                                               |                                                         |
| 23                   | 0.11                                       | 0.12         | <b>0.69</b> | 0.05        | 0.00        | (factor 3)                                         | 0.83                                                    |
| 34                   | 0.03                                       | 0.30         | <b>0.67</b> | -0.17       | -0.01       | 0.84                                               |                                                         |
| 36                   | 0.26                                       | 0.30         | <b>0.46</b> | 0.01        | -0.09       | 0.86                                               |                                                         |
| 13                   | 0.00                                       | 0.07         | -0.04       | <b>0.85</b> | -0.02       | 0.75                                               |                                                         |
| 15                   | 0.05                                       | 0.03         | 0.09        | <b>0.78</b> | -0.04       | 0.74                                               |                                                         |
| 14                   | 0.22                                       | 0.13         | -0.14       | <b>0.73</b> | 0.06        | 0.83                                               |                                                         |
| 20                   | -0.07                                      | 0.00         | 0.40        | <b>0.45</b> | 0.10        | (factor 4)                                         | 0.82                                                    |
| 12                   | 0.19                                       | -0.19        | 0.40        | <b>0.41</b> | -0.13       | 0.84                                               |                                                         |
| 18                   | 0.17                                       | 0.17         | -0.05       | -0.05       | <b>0.74</b> | 0.57                                               |                                                         |
| 19                   | 0.22                                       | 0.10         | 0.00        | -0.08       | <b>0.68</b> | 0.60                                               |                                                         |
| 6                    | -0.30                                      | 0.03         | 0.15        | 0.07        | <b>0.57</b> | 0.69                                               |                                                         |
| 8                    | -0.33                                      | -0.37        | 0.21        | 0.11        | <b>0.51</b> | (factor 5)                                         | 0.73                                                    |
| 4                    | 0.33                                       | 0.14         | -0.06       | 0.08        | <b>0.47</b> | 0.63                                               |                                                         |
| 11                   | 0.16                                       | -0.19        | 0.16        | 0.23        | <b>0.41</b> | 0.66                                               |                                                         |

*Note.* Two assumptions were tested to assess the suitability of the data for EFA: (1) Bartlett's test of sphericity was used to check whether a correlation matrix is present (i.e., a statistically significant test indicates that correlations among items are present) and (2) Kaiser-Meyer-Olkin (KMO) criterion was used to test the sampling adequacy (i.e., a KMO value close to 1 indicates that patterns

exist among item correlations and, thus, that factors could be identified in the correlation matrix). A statistically significant Bartlett's test ( $\chi^2 = 251.83$ ;  $df = 32$ ;  $p < 0.001$ ) and the KMO value of 0.93 showed that the assumptions for EFA were fulfilled. Five factors obtained eigenvalues of more than 1 and were retained based on parallel analysis. The rotated solution produced a clear factor structure, whereby most items loaded with high loadings of  $\pm 0.3$  or higher onto a single factor. In case of multiple high loadings, items were assigned into factors based on the highest loading of the item onto any of the five factors.

**Table S7.** *Factor correlations*

|          | Factor 1 | Factor 2 | Factor 3 | Factor 4 | Factor 5 |
|----------|----------|----------|----------|----------|----------|
| Factor 1 | 1.00     |          |          |          |          |
| Factor 2 | 0.40     | 1.00     |          |          |          |
| Factor 3 | 0.31     | 0.33     | 1.00     |          |          |
| Factor 4 | 0.37     | 0.33     | 0.33     | 1.00     |          |
| Factor 5 | 0.23     | 0.26     | 0.24     | 0.23     | 1.00     |

*Note.* Based on item content the following meaning was determined for the five factors. Factor 1: Professional disaster preparedness knowledge; Factor 2: Disaster management skills; Factor 3: Psychosocial emergency skills; Factor 4: Biological hazard skills. Factor 5: Personal disaster preparedness knowledge.
